# Supplementary material for: An Integrated Machine learning-based Stock Opening Price Prediction Model by RNN and LSTM
Source: Research Square preprint supplement (doi:10.21203/rs.3.rs-5471447/v1), 2025-04-15
Supplement: Supplementary file 1 [file 5e5ae8df1d5a2e483c7e1b1f.docx]

**Appendix**

Codes :

import numpy as np

import matplotlib.pyplot as plt

import pandas as pd

import yfinance as yf

from datetime import datetime, timedelta

today=datetime.now()

date=today - timedelta(days=1)

date_str=date.strftime('%Y-%m-%d')

data=yf.download (tickers='HCLTECH.NS', start='2007-09-17', end=date_str)

data.to_csv('rando.csv')

data = pd.read_csv("/content/rando.csv")

data.head()

data.tail()

data.info()

# Length of the data

length_data = len(data)

# Rows that the data has

split_ratio = 0.7 # Split ratio of 70% train, 30% validation

# Train and validation data length

length_train = round(length_data * split_ratio)

length_validation = length_data - length_train

print("Data length:", length_data)

print("Train data length:", length_train)

print("Validation data length:", length_validation)

# Splitting the data

train_data = data[:length_train].iloc[:, :2] # Selecting first two columns for train data

train_data['Date'] = pd.to_datetime(train_data['Date']) # Converting 'Date' to datetime object

train_data

validation_data = data[length_train:].iloc[:, :2]

validation_data['Date'] = pd.to_datetime(validation_data['Date'])

validation_data

dataset_train = train_data.Open.values

print(dataset_train.shape)

# Change 1D array to 2D array (reshape from (x,) to (x,1))

dataset_train = np.reshape(dataset_train, (-1, 1))

print(dataset_train.shape) # New shape of the dataset

from sklearn.preprocessing import MinMaxScaler

scaler = MinMaxScaler(feature_range=(0, 1))

# Scaling the dataset

dataset_train_scaled = scaler.fit_transform(dataset_train)

print(dataset_train_scaled.shape)

# Creating a plot with specified figure size

plt.subplots(figsize=(15, 6))

plt.plot(dataset_train_scaled)

plt.xlabel("Days (as 1st, 2nd, 3rd, etc.)")

plt.ylabel("Open Price")

plt.show()

x_train = []

y_train = []

time_step = 40

length_train = len(dataset_train_scaled)

# Creating training data

for i in range(time_step, length_train):

x_train.append(dataset_train_scaled[i-time_step:i, 0])

y_train.append(dataset_train_scaled[i, 0])

x_train, y_train = np.array(x_train), np.array(y_train)

print(f"x_train shape: {x_train.shape}")

print(f"y_train shape: {y_train.shape}")

# Reshaping X_train to be 3-dimensional: (samples, time_steps, 1 feature)

x_train = np.reshape(x_train, (x_train.shape[0], x_train.shape[1], 1))

# Reshaping y_train to be 2-dimensional: (samples, 1 target)

y_train = np.reshape(y_train, (y_train.shape[0], 1))

# Printing the shape of the reshaped arrays

print("Shape of X_train after reshape:", x_train.shape)

print("Shape of y_train after reshape:", y_train.shape)

x_train[0]

y_train[0]

dataset_validation = validation_data.Open.values

dataset_validation = np.reshape(dataset_validation, (-1, 1))

scaled_dataset_validation = scaler.fit_transform(dataset_validation)

print("Shape of scaled validation dataset:", scaled_dataset_validation.shape)

x_test = []

y_test = []

for i in range(time_step, length_validation):

x_test.append(scaled_dataset_validation[i-time_step:i, 0])

y_test.append(scaled_dataset_validation[i, 0])

# Converting lists to NumPy arrays

x_test = np.array(x_test)

y_test = np.array(y_test)

# Checking the shapes of the arrays

print(f"Shape of X_test: {X_test.shape}")

print(f"Shape of y_test: {y_test.shape}")

# Reshaping

x_test = np.reshape(x_test, (x_test.shape[0], x_test.shape[1], 1))

y_test = np.reshape(y_test, (-1, 1))

print("Shape of x_test after reshape:", x_test.shape)

print("Shape of y_test after reshape:", y_test.shape)

# Scaling y_train using the same scaler

y_train = scaler.fit_transform(y_train)

from keras.layers import LSTM, Dense, Dropout

from keras.models import Sequential

# Building the LSTM model

model_lstm = Sequential()

model_lstm.add(LSTM(64, return_sequences=True, input_shape=(x_train.shape[1], 1)))

model_lstm.add(LSTM(64, return_sequences=False))

# Adding a Dense layer with 32 neurons

model_lstm.add(Dense(32))

# Adding the output Dense layer with 1 neuron

model_lstm.add(Dense(1))

model_lstm.compile(loss="mean_squared_error", optimizer="adam", metrics=["accuracy"])

history2 = model_lstm.fit(x_train, y_train, epochs=15, batch_size=10)

y_pred = model_lstm.predict(x_train)

y_pred = scaler.inverse_transform(y_pred)

print(y_pred.shape)

y_train = scaler.inverse_transform(y_train)

print( y_train.shape)

model_lstm.summary()

print(history2.history.keys())

history2.history["loss"]

#Plotting Loss v s Epochs

plt.figure(figsise=(10,7))

plt.plot(history2.history["loss"])

plt.xlabel("Epochs")

plt.ylabel("Losses")

plt.title('LSTM Model, Loss vs Epoch')

plt.show()

#Plotting Accuracy v s Epochs

plt.figure(figsise=(10,5))

plt.plot(history2.history["loss"])

plt.xlabel("Epochs")

plt.ylabel("Losses")

plt.title('LSTM Model, Accuracy vs Epoch')

plt.show()

# Making predictions on the test data

y_pred_of_test = model_lstm.predict(x_test)

# Scaling back the predictions from 0-1 to the original values

y_pred_of_test = scaler.inverse_transform(y_pred_of_test)

print("Shape of y_pred_of_test:", y_pred_of_test.shape)

# Creating a figure with specified size

plt.figure(figsize=(30, 10))

plt.plot(y_pred_of_test, label='y_pred_of_test', c='orange')

plt.plot(scaler.inverse_transform(y_test), label='y_test', color='g')

plt.xlabel('Days')

plt.ylabel('Open Price')

plt.title('LSTM model, Prediction with Input x_test vs y_tes')

plt.legend()

plt.show()

from keras.models import load_model

model_lstm.save('lstm.h5')

model = load_model('lstm.h5')

predictions = model.predict(x_test)

binary_predictions = np.where(predictions>0.2,1 ,0)

new_y_test = np.where(y_test>0.2,1 ,0)

from sklearn.metrics import accuracy_score, precision_score, recall_score, f1_score

#calculate metrics

accuracy = accuracy_score(new_y_test, binary_predictions)

precision = precision_score(new_y_test, binary_predictions)

recall = recall_score(new_y_test, binary_predictions)

f1 = f1_score(new_y_test, binary_predictions)

# Print the metrics

print(f'Accuracy: {accuracy}')

print(f'Precision: {precision}')

print(f'Recall: {recall}')

print(f'F1 Score: {f1}')

from sklearn.metrics import classification_report

print(classification_report(new_y_test,binary_predictions)

data.iloc[-1]

x_input = data.iloc[-time_step:].Open.values

x_input = scaler.fit_transform(x_input.reshape(-1,1))

x_input = np.reshape(x_input,(1,time_step,1))

print("Shape o f X_input : " , x_input.shape)

x_input

LSTM_prediction = scaler.inverse_transform(model_lstm.predict(x_input))

print('LSTM prediction, Open price prediction for', date_str, 'is:', LSTM_prediction[0,0])

import numpy as np

import matplotlib.pyplot as plt

import pandas as pd

import yfinance as yf

from datetime import datetime, timedelta

today=datetime.now()

date=today - timedelta(days=1)

date_str=date.strftime('%Y-%m-%d')

data=yf.download (tickers='HCLTECH.NS', start='2007-09-17', end=date_str)

data.to_csv('rando.csv')

[*********************100%***********************] 1 of 1 completed

data = pd.read_csv("

/content/rando.csv")

data.head()

Date Open

High

Low

Close Adj Close Volume

0 2007-09-17 70.824997 70.824997 69.224998 69.487503 46.129009 1475064

1 2007-09-18 69.500000 70.500000 69.000000 70.187500 46.593708 1473988

2 2007-09-19 71.125000 72.224998 70.425003 71.037498 47.158001 3679388

3 2007-09-20 71.250000 71.250000 68.500000 68.875000 45.722408 4626540

4 2007-09-21 68.875000 70.349998 67.650002 68.937500 45.763901 6372496

Next steps:

data.tail() Date Open View recommended plots

 High

Low

New interactive sheet

Close Adj Close Volume

4198 2024-09-27 1810.0 1828.550049 1796.550049 1808.400024 1808.400024 4099016

4199 2024-09-30 1808.0 1820.699951 1789.150024 1796.099976 1796.099976 2117894

4200 2024-10-01 1790.0 1822.449951 1790.000000 1816.500000 1816.500000 1642542

4201 2024-10-03 1778.0 1809.300049 1770.000000 1778.550049 1778.550049 3552386

4202 2024-10-04 1778.0 1807.900024 1767.250000 1776.599976 1776.599976 2982759

data.info()

<class 'pandas.core.frame.DataFrame'>

RangeIndex: 4203 entries, 0 to 4202

Data columns (total 7 columns):

# Column Non-Null Count Dtype --- ------ -------------- -----

0 Date 4203 non-null object

1 Open 4203 non-null float64

2 High 4203 non-null float64

3 Low 4203 non-null float64

4 Close 4203 non-null float64

5 Adj Close 4203 non-null float64

6 Volume 4203 non-null int64

dtypes: float64(5), int64(1), object(1)

memory usage: 230.0+ KB

# Length of the data

length_data = len(data)

split_ratio = 0.7

# Train and validation data length

length_train = round(length_data * split_ratio)

length_validation = length_data - length_train

print("Data length:", length_data)

print("Train data length:", length_train)

print("Validation data length:", length_validation)

Data length: 4203

Train data length: 2942

Validation data length: 1261

# Splitting the data

train_data = data[:length_train].iloc[:, :2]

train_data['Date'] = pd.to_datetime(train_data['Date'])

train_data

Date Open

0 70.824997 2937 2019-08-22 535.250000

1 69.500000 2938 2019-08-23 539.500000

2 71.125000 2939 2019-08-26 545.799988

3 71.250000 2940 2019-08-27 549.500000

4 68.875000 2941 2019-08-28 548.500000

2942 rows × 2 columns

Generate code with train_data Next steps View recommended plots

validation_data = data[length_train:].iloc[:, :2]

validation_data['Date'] = pd.to_datetime(validation_data['Date'])

validation_data

Date Open

2942 2019-08-29 556.500000 4198 2024-09-27 1810.000000

2943 2019-08-30 557.849976 4199 2024-09-30 1808.000000

2944 2019-09-03 553.500000 4200 2024-10-01 1790.000000

2945 2019-09-04 556.174988 4201 2024-10-03 1778.000000

2946 2019-09-05 562.724976 4202 2024-10-04 1778.000000

1261 rows × 2 columns

New interactive sheet

Generate code with validation_data Next steps:

dataset_train = train_data.Open.values

print(dataset_train.shape) (2942,)

View recommended plots

# Change 1D array to 2D array (reshape from (x,) to (x,1))

dataset_train = np.reshape(dataset_train, (-1, 1))

print(dataset_train.shape) (2942, 1)

from sklearn.preprocessing import MinMaxScaler

scaler = MinMaxScaler(feature_range=(0, 1))

# Scaling the dataset

dataset_train_scaled = scaler.fit_transform(dataset_train)

print(dataset_train_scaled.shape) (2942, 1)

# Creating a plot with specified figure size

plt.subplots(figsize=(15, 6))

plt.plot(dataset_train_scaled)

plt.xlabel("Days (as 1st, 2nd, 3rd, etc.)")

plt.ylabel("Open Price")

plt.show()

New interactive sheet

x_train = []

y_train = []

time_step = 40

length_train = len(dataset_train_scaled)

# Creating training data

for i in range(time_step, length_train):

x_train.append(dataset_train_scaled[i-time_step:i, 0])

y_train.append(dataset_train_scaled[i, 0])

x_train, y_train = np.array(x_train), np.array(y_train)

print(f"x_train shape: {x_train.shape}")

print(f"y_train shape: {y_train.shape}")

x_train shape: (2902, 40)

y_train shape: (2902,)

# Reshaping X_train to be 3-dimensional: (samples, time_steps, 1 feature)

x_train = np.reshape(x_train, (x_train.shape[0], x_train.shape[1], 1))

# Reshaping y_train to be 2-dimensional: (samples, 1 target)

y_train = np.reshape(y_train, (y_train.shape[0], 1))

# Printing the shape of the reshaped arrays

print("Shape of X_train after reshape:", x_train.shape)

print("Shape of y_train after reshape:", y_train.shape)

Shape of X_train after reshape: (2902, 40, 1)

Shape of y_train after reshape: (2902, 1)

x_train[0]

array([[0.08708775],

[0.08473523],

[0.0876204 ],

[0.08784234],

[0.08362555],

[0.0851791 ],

[0.08540104],

[0.08695459],

[0.09671978],

[0.09893915],

[0.09516623],

[0.09316881],

[0.09738559],

[0.09716366],

[0.09893915],

[0.09893915],

[0.10515336],

[0.10870434],

[0.09782946],

[0.09683075],

[0.09627591],

[0.08118425],

[0.09982689],

[0.0980514 ],

[0.09572107],

[0.09674197],

[0.0956101 ],

[0.09405655],

[0.09807359],

[0.09889476],

[0.09938302],

[0.09989347],

[0.1011807 ],

[0.09671978],

[0.09547695],

[0.09847309],

[0.09716366],

[0.09272493],

[0.09347952],

[0.09445603]])

y_train[0]

array([0.09618713])

dataset_validation = validation_data.Open.values

dataset_validation = np.reshape(dataset_validation, (-1, 1))

scaled_dataset_validation = scaler.fit_transform(dataset_validation)

print("Shape of scaled validation dataset:", scaled_dataset_validation.shape)

Shape of scaled validation dataset: (1261, 1)

x_test = []

y_test = []

for i in range(time_step, length_validation):

x_test.append(scaled_dataset_validation[i-time_step:i, 0])

y_test.append(scaled_dataset_validation[i, 0])

# Converting lists to NumPy arrays

x_test = np.array(x_test)

y_test = np.array(y_test)

# Checking the shapes of the arrays

print(f"Shape of X_test: {x_test.shape}")

print(f"Shape of y_test: {y_test.shape}")

Shape of X_test: (1221, 40)

Shape of y_test: (1221,)

x_test = np.reshape(x_test, (x_test.shape[0], x_test.shape[1], 1))

y_test = np.reshape(y_test, (-1, 1))

print("Shape of x_test after reshape:", x_test.shape)

print("Shape of y_test after reshape:", y_test.shape)

Shape of x_test after reshape: (1221, 40, 1)

Shape of y_test after reshape: (1221, 1)

# Scaling y_train using the same scaler

y_train = scaler.fit_transform(y_train)

from keras.layers import LSTM, Dense, Dropout

from keras.models import Sequential

# Building the LSTM model

model_lstm = Sequential()

model_lstm.add(LSTM(64, return_sequences=True, input_shape=(x_train.shape[1], 1)))

model_lstm.add(LSTM(64, return_sequences=False))

# Adding a Dense layer with 32 neurons

model_lstm.add(Dense(32))

# Adding the output Dense layer with 1 neuron

model_lstm.add(Dense(1))

model_lstm.compile(loss="mean_squared_error", optimizer="adam", metrics=["accuracy"])

history2 = model_lstm.fit(x_train, y_train, epochs=15, batch_size=10) Epoch 1/15

/usr/local/lib/python3.10/dist-packages/keras/src/layers/rnn/rnn.py:204: UserWarning: Do not pass an `input_shape`/`inpu

super().__init__(**kwargs)

291/291 ━━━ 12s 30ms/step - accuracy: 4.2257e-04 - loss: 0.0216 Epoch 2/15

291/291 ━━━ 8s 27ms/step - accuracy: 2.7663e-04 - loss: 4.2827e-04 Epoch 3/15

291/291 ━━━11s 28ms/step - accuracy: 1.4492e-04 - loss: 4.5034e-04 Epoch 4/15

291/291 ━━━10s 28ms/step - accuracy: 6.8918e-04 - loss: 4.0734e-04 Epoch 5/15

291/291 ━ 9s 30ms/step - accuracy: 3.3636e-04 - loss: 3.8105e-04 Epoch 6/15

291/291 ━━ 9s 27ms/step - accuracy: 6.4970e-04 - loss: 4.3603e-04 Epoch 7/15

291/291 ━━━8s 29ms/step - accuracy: 8.7441e-05 - loss: 3.7033e-04 Epoch 8/15

291/291 ━━9s 30ms/step - accuracy: 6.8898e-04 - loss: 2.8478e-04 Epoch 9/15

291/291 ━━9s 30ms/step - accuracy: 7.6069e-04 - loss: 2.5629e-04 Epoch 10/15

291/291 ━━ 9s 30ms/step - accuracy: 6.5024e-04 - loss: 2.6522e-04 Epoch 11/15

291/291 ━━10s 30ms/step - accuracy: 7.2176e-04 - loss: 2.2295e-04 Epoch 12/15

291/291 ━━━10s 28ms/step - accuracy: 0.0011 - loss: 2.0474e-04 Epoch 13/15

291/291 ━━━10s 26ms/step - accuracy: 0.0017 - loss: 2.4181e-04 Epoch 14/15

291/291 ━━━11s 28ms/step - accuracy: 0.0012 - loss: 2.1958e-04 Epoch 15/15

291/291 ━━━13s 37ms/step - accuracy: 5.1325e-04 - loss: 2.1505e-04

y_pred = model_lstm.predict(x_train)

y_pred = scaler.inverse_transform(y_pred)

print(y_pred.shape)

91/91 ━━━━━━━━━━━━━━5s 40ms/step (2902, 1)

y_train = scaler.inverse_transform(y_train)

print( y_train.shape) (2902, 1)

model_lstm.summary()

Model: "sequential"

┏━━━━━┳━━━━━━━━━━━━━━━━━━━━━━━━━━━━━┓

┃ Layer (type)

┃ Output Shape

┃

Param # ┃

┡━━━━━━━━╇━━━━━━━━━━╇━━━━━━━━━━━━━━━━━

│ lstm (LSTM) │ (None, 40, 64) │ 16,896 │

├───────────────────────────────┼─────────────────┤

│ lstm_1 (LSTM) │ (None, 64) │ 33,024 │

├────────────── ────────────────┼─────────────────┤

│ dense (Dense) │ (None, 32) │ 2,080 │

├────────────────────────────────┼────────────────

│ dense_1 (Dense) │ (None, 1) │ 33 │

└─────────────────────────────────┴───────────────

Total params: 156,101 (609.77 KB)

Trainable params: 52,033 (203.25 KB)

Non-trainable params: 0 (0.00 B)

Optimizer params: 104,068 (406.52 KB)

print(history2.history.keys())

dict_keys(['accuracy', 'loss'])

history2.history["loss"]

[0.004752226639539003,

0.00044702665763907135,

0.000443122407887131,

0.0003891082014888525,

0.0004004521470051259,

0.0003580720804166049,

0.0003725299029611051,

0.000324748398270458,

0.00024651779676787555,

0.0002513855288270861,

0.00023219203285407275,

0.0002239526220364496,

0.00021084111358504742,

0.0002097617252729833,

0.0001798996381694451]

#Plotting Loss v s Epochs

plt.figure(figsize=(10,7))

plt.plot(history2.history["loss"])

plt.xlabel("Epochs")

plt.ylabel("Losses")

plt.title('LSTM Model, Loss vs Epoch')

plt.show()

#Plotting Accuracy v s Epochs

plt.figure(figsize=(10,5))

plt.plot(history2.history["loss"])

plt.xlabel("Epochs")

plt.ylabel("Losses")

plt.title('LSTM Model, Accuracy vs Epoch')

plt.show()

# Making predictions on the test data

y_pred_of_test = model_lstm.predict(x_test)

# Scaling back the predictions from 0-1 to the original values

y_pred_of_test = scaler.inverse_transform(y_pred_of_test)

print ("Shape of y_pred_of_test:", y_pred_of_test.shape)

39/39 ━━━━━━━━1s 18ms/step Shape of y_pred_of_test: (1221, 1)

# Creating a figure with specified size

plt.figure(figsize=(30, 10))

plt.plot(y_pred_of_test, label='y_pred_of_test', c='orange')

plt.plot(scaler.inverse_transform(y_test), label='y_test', color='g')

plt.xlabel('Days')

plt.ylabel('Open Price')

plt.title('LSTM model, Prediction with Input x_test vs y_tes')

plt.legend()

plt.show()

from keras.models import load_model

model_lstm.save('lstm.h5')

WARNING:absl:You are saving your model as an HDF5 file via `model.save()` or `keras.saving.save_model(model)`. This file

model = load_model('lstm.h5')

predictions = model.predict(x_test)

binary_predictions = np.where(predictions>0.2,1 ,0)

new_y_test = np.where(y_test>0.2,1 ,0)

WARNING:absl:Compiled the loaded model, but the compiled metrics have yet to be built. `model.compile_metrics` will be e

39/39 ━━━━━━━━━━━━━━━━━━━━ 2s 23ms/step

from sklearn.metrics import accuracy_score, precision_score, recall_score, f1_score

#calculate metrics

accuracy = accuracy_score(new_y_test, binary_predictions)

precision = precision_score(new_y_test, binary_predictions)

recall = recall_score(new_y_test, binary_predictions)

f1 = f1_score(new_y_test, binary_predictions)

# Print the metrics

print(f'Accuracy: {accuracy}')

print(f'Precision: {precision}')

print(f'Recall: {recall}')

print(f'F1 Score: {f1}')

Accuracy: 0.9926289926289926

Precision: 0.9990281827016521

Recall: 0.9922779922779923

F1 Score: 0.9956416464891041

from sklearn.metrics import classification_report

print (classification_report(new_y_test,binary_predictions))

precision recall f1-score support

0 0.96 0.99 0.98 185

1 1.00 0.99 1.00 1036

accuracy 0.99 1221

macro avg 0.98 0.99 0.99 1221

weighted avg 0.99 0.99 0.99 1221

data.iloc[-1]

4202

Date 2024-10-04

Open 1778.0

High 1807.900024

Low 1767.25

Close 1776.599976

Adj Close 1776.599976

Volume 2982759

dtype: object

x_input = data.iloc[-time_step:].Open.values

x_input = scaler.fit_transform(x_input.reshape(-1,1))

x_input = np.reshape(x_input,(1,time_step,1))

print("Shape o f X_input : " , x_input.shape)

x_input

Shape o f X_input : (1, 40, 1)

array([[[0.07883817],

[0.02863081],

[0.04979253],

[0. ],

[0.09170114],

[0.23651452],

[0.36099585],

[0.42323651],

[0.44813278],

[0.45228216],

[0.40684668],

[0.38589212],

[0.61348538],

[0.55829896],

[0.56431535],

[0.72136919],

[0.77261391],

[0.94605809],

[0.77634845],

[0.8879668 ],

[0.87136929],

[0.74834015],

[0.71141059],

[0.83070519],

[0.92116183],

[0.94190871],

[1. ],

[0.97074669],

[0.95477168],

[0.82157676],

[0.70539419],

[0.77178423],

[0.71369295],

[0.83319522],

[0.84751037],

[0.9626556 ],

[0.95435685],

[0.87966805],

[0.82987552],

[0.82987552]]])

LSTM_prediction = scaler.inverse_transform(model_lstm.predict(x_input))

print('LSTM prediction, Open price prediction for', date_str, 'is:', LSTM_prediction[0,0])

1/1 ━━ 0s 32ms/step LSTM prediction, Open price prediction for 2024-10-05 is: 1775.8292
